# Supplementary material for: Karyological analysis and FISH physical mapping of 18S rDNA genes, (GATA)n centromeric and (TTAGGG)n telomeric sequences in Conus magus Linnaeus, 1758
Source: Oxford University Press journal article supplement (doi:10.1093/mollus/eyu090), 2015-02-16
Supplement: eyu090supp_fig1.pdf [file eyu090supp_fig1.pdf]

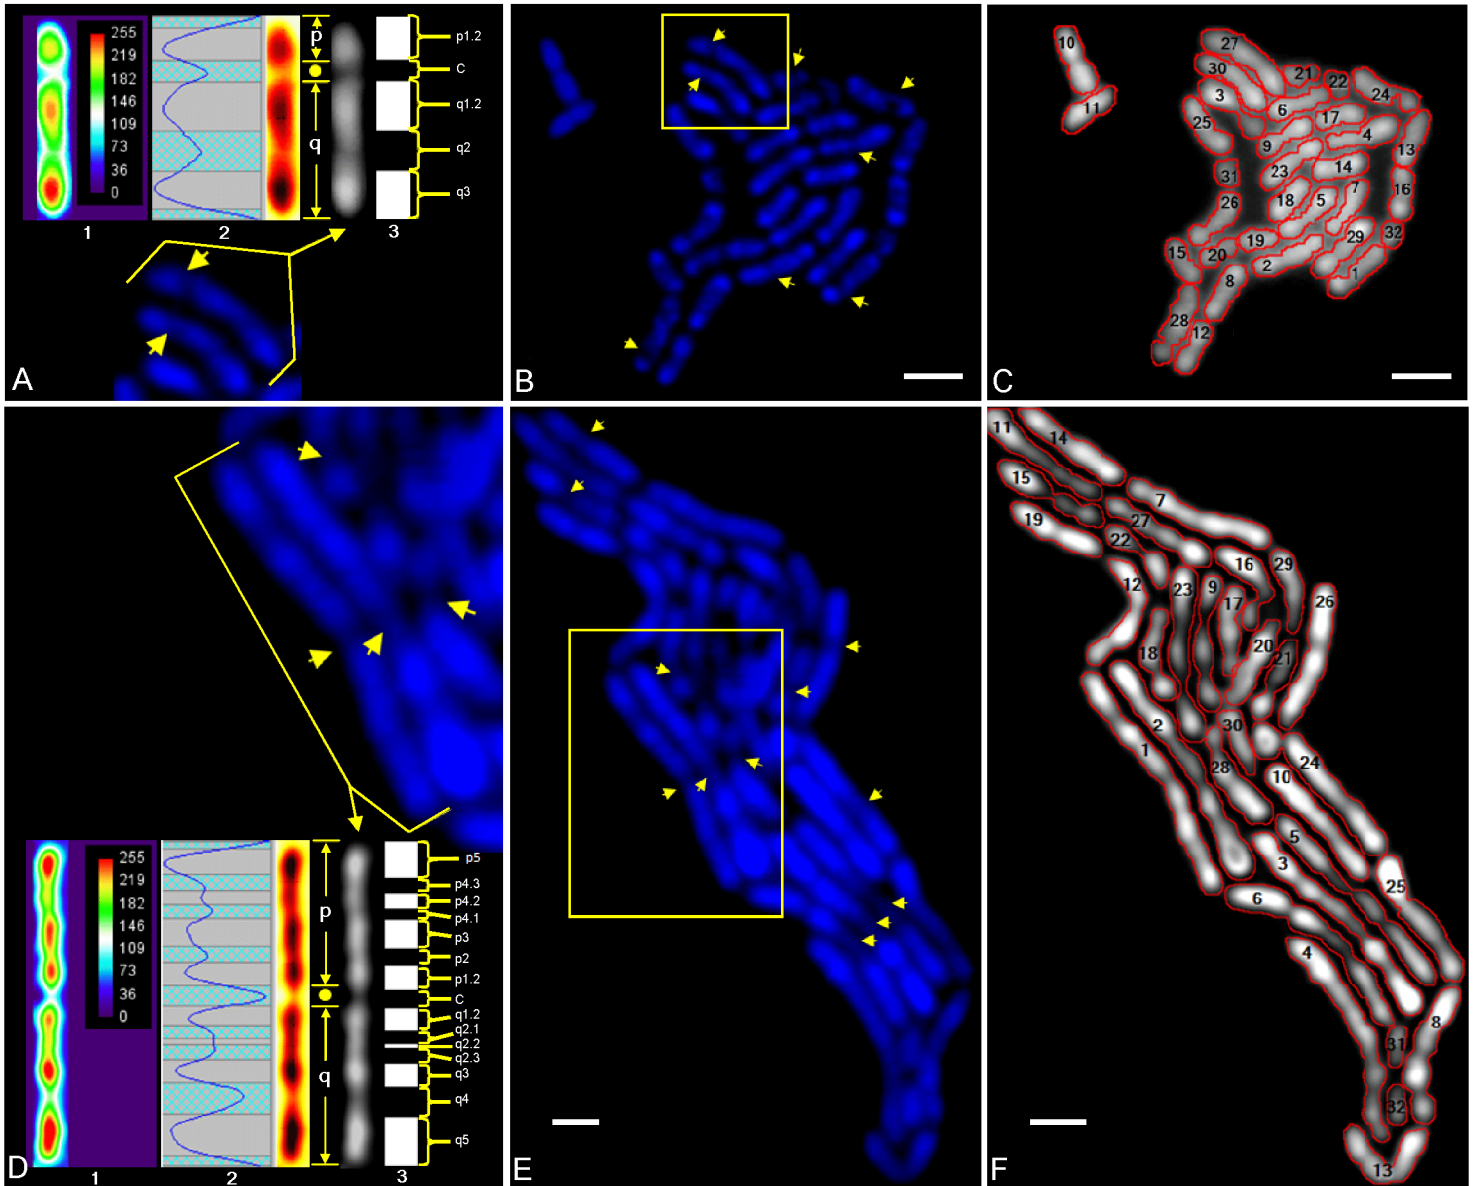

**Figure S1.** A to C and D to F show DAPI counterstained chromosomal spreads (2N=32) showing non-extended (sl48cl06) and extended (sl99cl49) chromosomes, respectively, from *C. magus* gill cells grown *in vitro*. A and D show the enlarged (2X) region bounded by the yellow polygon in B and E, respectively. DAPI-banding profile analysis for chromosome 27 (sl48cl06) and chromosome 1 (sl99cl49) in yellow brackets are shown in A1 to A3 and D1 to D3, respectively (p = short arm, q = long arm and c = centromere). A1 and D1 show the intensity profile for each chromosome region with corresponding heatmap histogram and intensity scale. Plot profiles in A2 and D2 show gray and criss-crossed area that corresponds to the chromosomes lightly stained regions (euchromatic) and darkly stained regions (heterochromatic), respectively. A3 and D3 show each chromosome bands labeled according to their position from the centromere. Other prominent heterochromatic regions are indicated by yellow arrows in B and E. Chromosome counts are shown in C and F. Scale bars = 1  $\mu$ m.
