# Supplementary material for: Karyological analysis and FISH physical mapping of 18S rDNA genes, (GATA)n centromeric and (TTAGGG)n telomeric sequences in Conus magus Linnaeus, 1758
Source: Oxford University Press journal article supplement (doi:10.1093/mollus/eyu090), 2015-02-16
Supplement: eyu090supp_table2.pdf [file eyu090supp_table2.pdf]

**Table S2.** Outputs of two model based clustering procedures using R mclust (upper block) (Fraley & Raftery, 2002; Fraley *et al.*, 2012) and R spEMsymloc (lower block) (Bordes, Mottelet & Vandekerkhove, 2006; Hunter, Wang & Hettmansperger, 2007; Benaglia *et al.*, 2009).

| Model Based Clustering                                             |                    |            |            |           |
|--------------------------------------------------------------------|--------------------|------------|------------|-----------|
| Gaussian Finite Mixture Model Fitted by EM algorithm               |                    |            |            |           |
| Mclust V (univariate, unequal variance) Model with 3 components    |                    |            |            |           |
| Log.lik                                                            | n                  | df         | BIC        | ICL       |
| -6083.291                                                          | 655                | 8          | -12218.46  | -12409.76 |
| Clustering Table                                                   |                    |            |            |           |
|                                                                    | Mixture Components |            |            |           |
|                                                                    | 1                  | 2          | 3          |           |
| Mixing Probabilities                                               | 0.2899255          | 0.3886456  | 0.3214289  |           |
| Means                                                              | 469.8719           | 2638.3346  | 8490.3462  |           |
| Variances                                                          | 68870.3            | 1825797.5  | 21690318.7 |           |
| Univariate Symmetric, Semi-parametric Model Fitted by EM Algorithm |                    |            |            |           |
| Observations                                                       | 655                |            |            |           |
| Coordinates                                                        | 1                  |            |            |           |
| Bandwidth                                                          | 903.2              |            |            |           |
|                                                                    | Mixture Components |            |            |           |
|                                                                    | 1                  | 2          | 3          |           |
| lambdahat                                                          | 0.78671658         | 0.17426630 | 0.03901713 |           |
| muhat                                                              | 2142.936           | 8781.016   | 17288.044  |           |

**Legend:** n = sample size; Log.lik = Log.likelihood; df = degrees of freedom; BIC = Bayesian inference criteria and ICL = integrated completed likelihood.
