# Supplementary material for: Karyological analysis and FISH physical mapping of 18S rDNA genes, (GATA)n centromeric and (TTAGGG)n telomeric sequences in Conus magus Linnaeus, 1758
Source: Oxford University Press journal article supplement (doi:10.1093/mollus/eyu090), 2015-02-16
Supplement: eyu090supp_table5.pdf [file eyu090supp_table5.pdf]

**Table S5.** Paired samples tests involving the means and medians of FISH signal scores from spread a(sl48cl06) and b(sl99cl49) using paired t-test (parametric) and Wilcoxon matched-pairs signed rank test (non-parametric), respectively.

| FISH Signal Score Statistics            |                      |       |                      |       |                 |               |                 |
|-----------------------------------------|----------------------|-------|----------------------|-------|-----------------|---------------|-----------------|
|                                         | Mean                 |       | n                    |       | Std. Deviation  |               | Std. Error Mean |
| a                                       | 58.31                |       | 13                   |       | 10.79           |               | 2.992           |
| b                                       | 53.62                |       | 13                   |       | 15.80           |               | 4.383           |
| Paired Samples Test                     |                      |       |                      |       |                 |               |                 |
|                                         | Min                  | 25% P | Median               | 75% P | Max             | Lower CI      | Upper CI        |
| a                                       | 41                   | 51    | 56                   | 66    | 78              | 51.79         | 64.83           |
| b                                       | 31                   | 39.5  | 55                   | 64.5  | 88              | 44.07         | 63.17           |
| Paired T-test                           |                      |       |                      |       |                 |               |                 |
|                                         | Mean differences     |       |                      |       | 95% CI          |               |                 |
|                                         | 4.692                |       |                      |       | -1.497 to 10.88 |               |                 |
| $\alpha$                                | P value (two-tailed) |       | P value (one-tailed) |       | r               | t             | df              |
| 0.05                                    | 0.1245               |       | 0.0011               |       | .7661           | 1.652         | 12              |
| Wilcoxon Matched-Pairs Signed Rank Test |                      |       |                      |       |                 |               |                 |
| $\alpha$                                | P value (two-tailed) |       | P value (one-tailed) |       | rs              | sum(+,ranks)  | W               |
| 0.05                                    | 0.1553               |       | 0.0004               |       | 0.8122          | 68.50, -22.50 | 46              |

**Legend:** r = correlation coefficient; rs = Spearman, approximation; df = degrees of freedom.
